# Supplementary material
Source: HighWire-hosted journal article supplement (https://cmajopen-stage.highwire.org/highwire/filestream/90456/field_highwire_adjunct_files/1/open-2022-0212-gripp2-checklist.pdf)
Supplement: open-2022-0212-gripp2-checklist.pdf [file open-2022-0212-gripp2-checklist.pdf]

**GRIPP2 Short Form**

| Section and Topic                   | Description                                                                                                                               | Reported on Page No.                                                                                                                                                                                                                                                        |
|-------------------------------------|-------------------------------------------------------------------------------------------------------------------------------------------|-----------------------------------------------------------------------------------------------------------------------------------------------------------------------------------------------------------------------------------------------------------------------------|
| 1. Aim                              | Report the aim of PPI in the study                                                                                                        | To design an arts-based workshop for data collection that is sensitive to the lived experiences of participants                                                                                                                                                             |
| 2. Methods                          | Provide a clear description of the methods used for PPI in the study                                                                      | Three patient partners were recruited and met 3 times throughout the study, in addition to some communication and collaboration via email and google docs. They provided insights on how to structure the arts activity and contributed to the workshop outline and script. |
| 3. Study results                    | Report the results of PPI in the study, including both positive and negative outcomes                                                     | The patient partners provided valuable insight on how to design the workshop so that it was sensitive to the lived experiences of people with chronic illnesses and did not overtax participants.                                                                           |
| 4. Discussions and conclusions      | Comment on the extent to which PPI influenced the study overall. Describe positive and negative effects.                                  | N/A                                                                                                                                                                                                                                                                         |
| 5. Reflections/critical perspective | Comment critically on the study, reflecting on the things that went well and those that did not, so others can learn from this experience | Using a collaborative document to co-design the workshop worked very well. It was difficult to extensively involve patient partners in the entirety of the study due to the time limitations of completing this project as a master's thesis (e.g., 1 year).                |
